# Supplementary material
Source: publisher figshare collection journal article supplement (https://future-science-group.figshare.com/ndownloader/files/34016621)
Supplement: Supplementary file 1 [file 34016621]

**Table C:**

**Treatment Outcomes of Cyberknife specific by tumors' location**

| **Location** | **Tumor type** | **Tumour size** | **Length of Followup (Months)** | **Total dose (Gy)** | **Effectiveness result** | **Safety result** |
| --- | --- | --- | --- | --- | --- | --- |
| Intracranial [1,2,5, 9, 14] | single brain metastases, perioptic lesions, Pituitary adenomas, cerebral metastases, Active acromegaly, vestibular schwannoma, glomus tumors of temporal bone | 0.02-19.8 cm3 | 2-120 | 14-25 | LC: 92-100%; improvement in sight: 16-45%; hormone level improvement: 44.4-100%; hearing preservation:79.1% | adverse radiation reactions: 19.2%; trigeminal neuropathy, facial neuropathy, brainstem of cerebellar edema: 1.8-2% |
| Spine [2, 4, 6, 8] | spinal tumors, spinal metastases, central nervous system hemangioblastoma, spinal arteriovenous malformations | 0.12-0.26cm3 | 2-54.3 | 12.6-30.6 | LC:73-100%; pain improvement: 25-100%; progression-free survival: 86-100% | vertebral compression fractures, symptomatic myelopathy happen:6.7-8.5% |
| Chest/Lung [1,2,17] | breast cancer primary and spine metastases, non-resectable primary lung tumors and metastases, after pneumonectomy | - | 2-48 | 10-30.6 | LC (received ＜20 Gy): 54-73.9%; LC (received ＞20 Gy): 91-1005 | NS |
| Digestive organ [2,11,18] | pancreatic tumors, colorectal cancer liver metastases, liver malignancies | 0.7-10 cm | 2-48 | 12.6-60 | LC: 40-97.1%; OS: 38-95.2% | NR |
| Urogenital tumors [3, 7,12, 13, 16] | prostate cancer, cervix cancer | - | 4-56 | 16-50 | LC: 75-100%; bPFS: 81-100%; actuarial freedom from biochemical failure: 92.7-100% | acute urine/rectal toxicity: 3-42%; late urine/rectal toxicity: 3-32%; late grade ≥3 GI/GU toxicity: 0-5.5% |
| Non-cancer diseases [2, 10, 15] | trigeminal neuralgia, arterio-venous malformations | - | 2-48 | 18-80.5 | pain control: 40-92.7%; reduction of MAV: 33% | recurrence of pain: 13.7-33%; hypesthesia rate: 11.8-51.2% |

Gy, Gray; bPFS, biochemical progression-free survival; PFS, progression-free survival; LC, local control; OS, overall survival; MAV, malformations of arterio-venous; GI, gastrointestinal; GU, genitourinary; NR, not reported; NS, not specific.

**Reference**

1. TomoTherapy, Gamma Knife, and CyberKnife Therapies for Patients with Tumours of the Lung, Central Nervous System, or Intra-abdomen: A Systematic Review of Clinical Effectiveness and Cost-Effectiveness*.* *CADTH Technol Overv* 1(3), e0119 (2010).

2. Calcerrada Díaz-Santos N, Blasco Amaro JA, Cardiel GA, Andradas Aragonés E. The safety and efficacy of robotic image-guided radiosurgery system treatment for intra- and extracranial lesions: a systematic review of the literature*.* *Radiother Oncol* 89(3), 245-253 (2008).

3. Tan TJ, Siva S, Foroudi F, Gill S. Stereotactic body radiotherapy for primary prostate cancer: a systematic review*.* *J Med Imaging Radiat Oncol* 58(5), 601-611 (2014).

4. Hernández-Durán S, Hanft S, Komotar RJ, Manzano GR. The role of stereotactic radiosurgery in the treatment of intramedullary spinal cord neoplasms: a systematic literature review*.* *Neurosurg Rev* 39(2), 175-183; discussion 183 (2016).

5. Mahboubi H, Sahyouni R, Moshtaghi O *et al*. CyberKnife for Treatment of Vestibular Schwannoma: A Meta-analysis*.* *Otolaryngol Head Neck Surg* 157(1), 7-15 (2017).

6. Myrehaug S, Sahgal A, Hayashi M *et al*. Reirradiation spine stereotactic body radiation therapy for spinal metastases: systematic review*.* *J Neurosurg Spine* 27(4), 428-435 (2017).

7. Ponti E, Lancia A, Ost P *et al*. Exploring All Avenues for Radiotherapy in Oligorecurrent Prostate Cancer Disease Limited to Lymph Nodes: A Systematic Review of the Role of Stereotactic Body Radiotherapy*.* *Eur Urol Focus* 3(6), 538-544 (2017).

8. Pan J, Jabarkheel R, Huang Y, Ho A, Chang SD. Stereotactic radiosurgery for central nervous system hemangioblastoma: systematic review and meta-analysis*.* *J Neurooncol* 137(1), 11-22 (2018).

9. Sahyouni R, Mahboubi H, Moshtaghi O *et al*. Radiosurgery of Glomus Tumors of Temporal Bone: a Meta-analysis*.* *Otol Neurotol* 39(4), 488-493 (2018).

10. Tuleasca C, Régis J, Sahgal A *et al*. Stereotactic radiosurgery for trigeminal neuralgia: a systematic review*.* *J Neurosurg* 130(3), 733-757 (2018).

11. Petrelli F, Comito T, Barni S, Pancera G, Scorsetti M, Ghidini A. Stereotactic body radiotherapy for colorectal cancer liver metastases: A systematic review*.* *Radiother Oncol* 129(3), 427-434 (2018).

12. Cushman TR, Verma V, Khairnar R, Levy J, Simone CB, 2nd, Mishra MV. Stereotactic body radiation therapy for prostate cancer: systematic review and meta-analysis of prospective trials*.* *Oncotarget* 10(54), 5660-5668 (2019).

13. Loi M, Wortel RC, Francolini G, Incrocci L. Sexual Function in Patients Treated With Stereotactic Radiotherapy For Prostate Cancer: A Systematic Review of the Current Evidence*.* *J Sex Med* 16(9), 1409-1420 (2019).

14. Fadel HA, El Ahmadieh TY, Plitt AR *et al*. Oculomotor Schwannomas: A Systematic Review and Report of Two Pediatric Cases Treated with Fractionated Cyberknife Stereotactic Radiotherapy*.* *World Neurosurg* 129 487-496 (2019).

15. Zhan PL, Jahromi BS, Kruser TJ, Potts MB. Stereotactic radiosurgery and fractionated radiotherapy for spinal arteriovenous malformations - A systematic review of the literature*.* *J Clin Neurosci* 62 83-87 (2019).

16. Yanez L, Ciudad AM, Mehta MP, Marsiglia H. What is the evidence for the clinical value of SBRT in cancer of the cervix? *Rep Pract Oncol Radiother* 23(6), 574-579 (2018).

17. Arifin AJ, Al-Shafa F, Chen H *et al*. Is lung stereotactic ablative radiotherapy safe after pneumonectomy?-a systematic review*.* *Transl Lung Cancer Res* 9(2), 348-353 (2020).

18. Lee J, Shin IS, Yoon WS, Koom WS, Rim CH. Comparisons between radiofrequency ablation and stereotactic body radiotherapy for liver malignancies: Meta-analyses and a systematic review*.* *Radiother Oncol* 145 63-70 (2020).
